# Supplementary material
Source: PubMed Central journal article supplement (PMC3490425)
Supplement: NIHMS346804-supplement-01.pdf [file NIHMS346804-supplement-01.pdf]

## Supplementary Material

### Reversible $\alpha$ -helix formation controlled by a hydrogen bond surrogate

Stephen E. Miller, Neville R. Kallenbach\* and Paramjit S. Arora\*

*Department of Chemistry, New York University, New York, NY 10003, USA*

#### Table of Contents

|                            | page  |
|----------------------------|-------|
| Circular dichroism spectra | S2    |
| NMR spectra of dsHBS 2     | S3-S7 |

---

\* Corresponding authors. Tel.: +1-212-998-8757 (N.R.K.) and +1-212-998-8470 (P.S.A.); e-mail: nrk1@nyu.edu (N.R.K.) and arora@nyu.edu (P.S.A.)

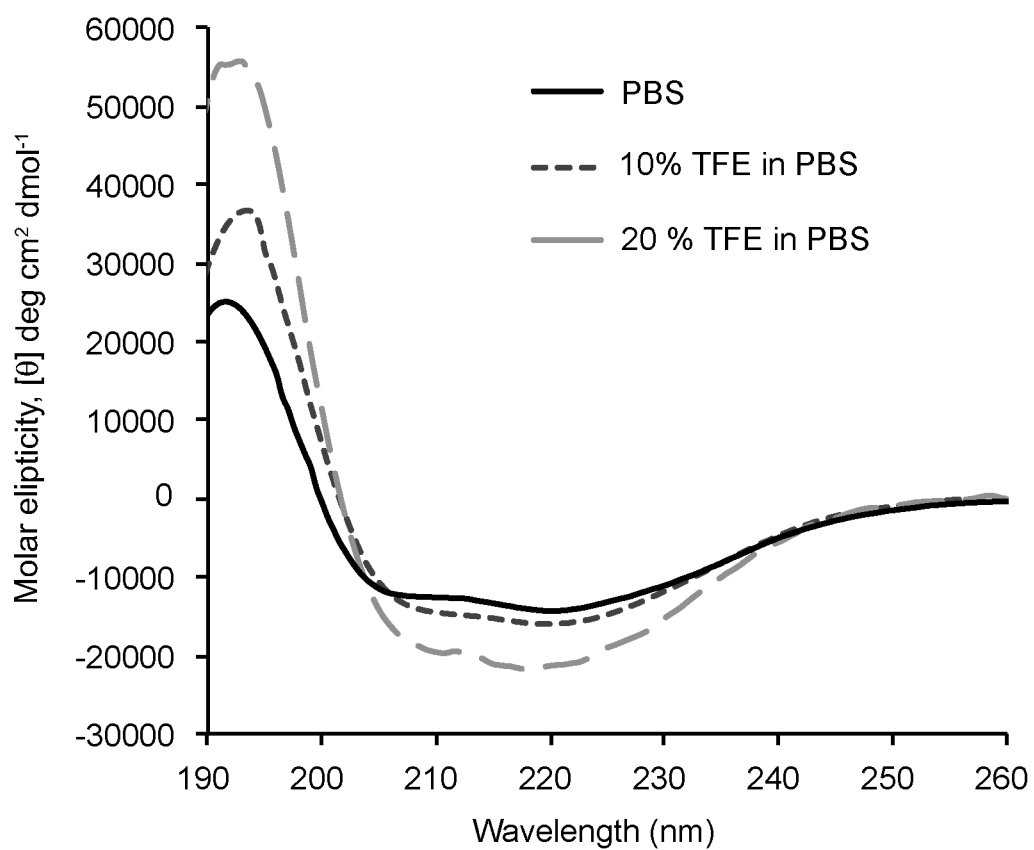

**Figure S1.** CD spectra of dsHBS 2 in mixtures of PBS and TFE.

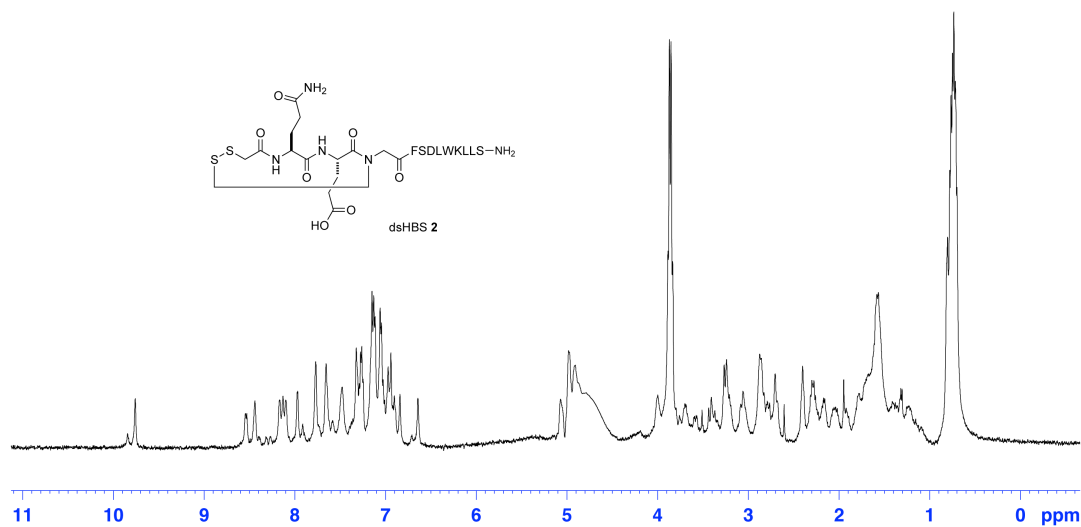

**Figure S2.** <sup>1</sup>H NMR of dsHBS 2 in 20% trifluoroethanol-d<sub>3</sub>/PBS.

**Table S1.** <sup>1</sup>H NMR assignments and chemical shifts (δ, ppm) for dsHBS 2 in 20% trifluoroethanol-d<sub>3</sub>/PBS.

| Residue         | NH   | H $\alpha$ | H $\beta$  | H $\gamma$ | H $\delta$ | H $\epsilon$ |
|-----------------|------|------------|------------|------------|------------|--------------|
| Q <sup>1</sup>  | 8.54 | 4.47       | 1.93       | 2.27       | -          | -            |
| E <sup>2</sup>  | 8.40 | 4.24       | 2.1        | 2.38       | -          | -            |
| G <sup>3</sup>  | -    | *          | -          | -          | -          | -            |
| F <sup>4</sup>  | 7.13 | 4.27       | 3.06, 2.85 | -          | -          | -            |
| S <sup>5</sup>  | 7.98 | 4.18       | 3.89       | -          | -          | -            |
| D <sup>6</sup>  | 8.17 | 4.44       | 2.75       | -          | -          | -            |
| L <sup>7</sup>  | 8.14 | 3.99       | 1.59       | 1.33       | 0.72       | -            |
| W <sup>8</sup>  | 8.10 | 4.20       | 3.20       | -          | -          | -            |
| K <sup>9</sup>  | 7.66 | 4.01       | 1.75       | 1.57       | 1.37       | 3.25         |
| L <sup>10</sup> | 7.77 | 3.98       | 1.49       | 1.74       | 0.77       | -            |
| L <sup>11</sup> | 8.12 | 3.99       | 1.59       | 1.33       | 0.72       | -            |
| S <sup>12</sup> | 7.65 | 4.00       | 3.67       | -          | -          | -            |

\* $\alpha$ CH for glycine could not be unambiguously assigned.

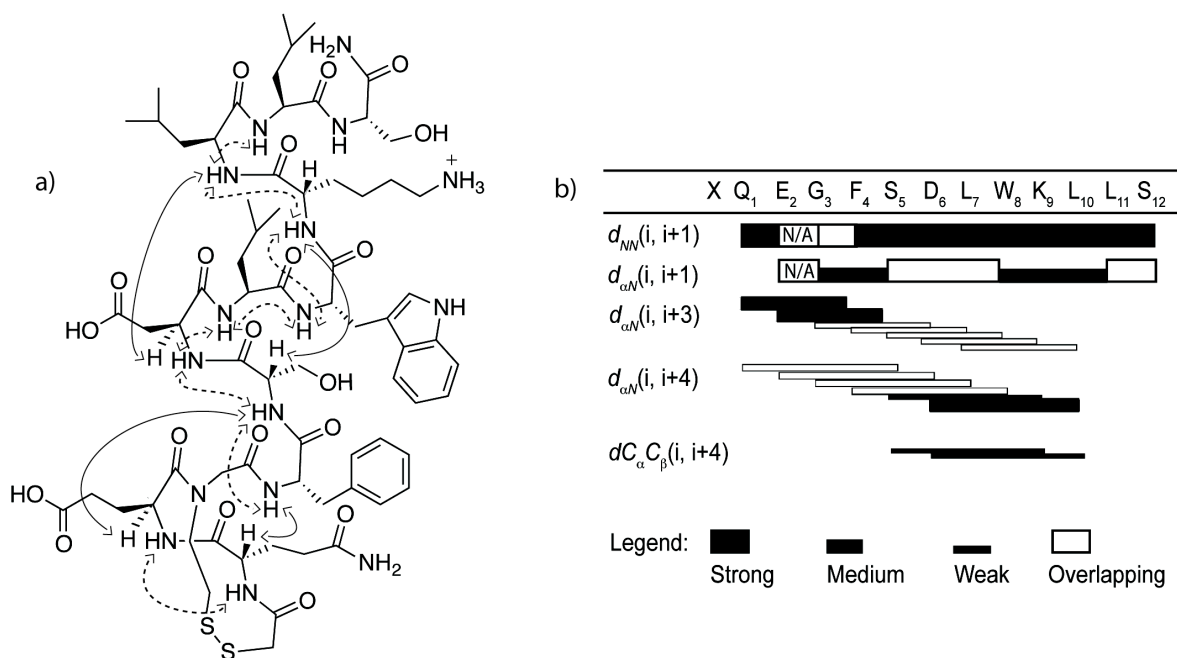

**Figure S3.** Observed NOE's for dsHBS 2. a) arrows depicting short (dashed) and medium (solid) range NOE's. b) complete NOESY correlation chart. Note: the glycine-3 residue is N-alkylated. Filled rectangles indicate relative intensities of NOE cross-peaks. Empty rectangles indicate NOEs that could not be unambiguously assigned because of overlapping signals.

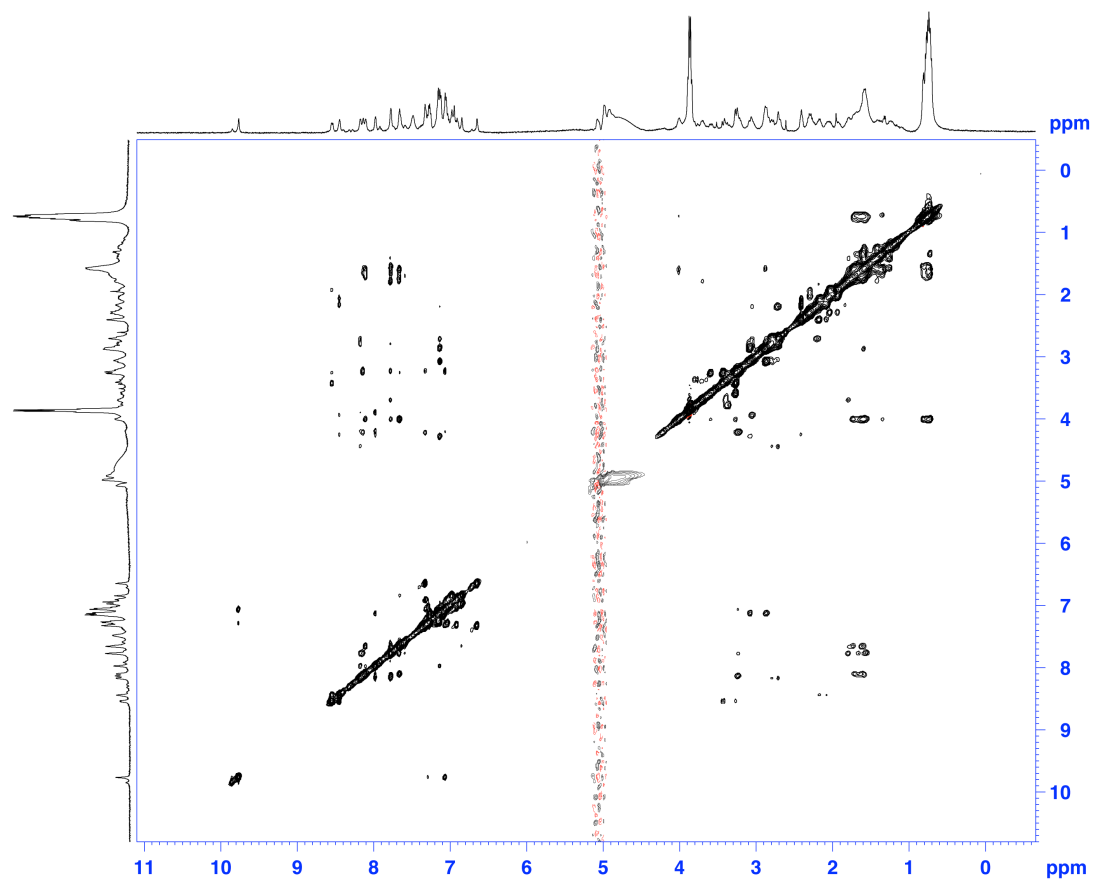

**Figure S4.** NOESY spectrum for dsHBS 2 in 20% TFE/PBS

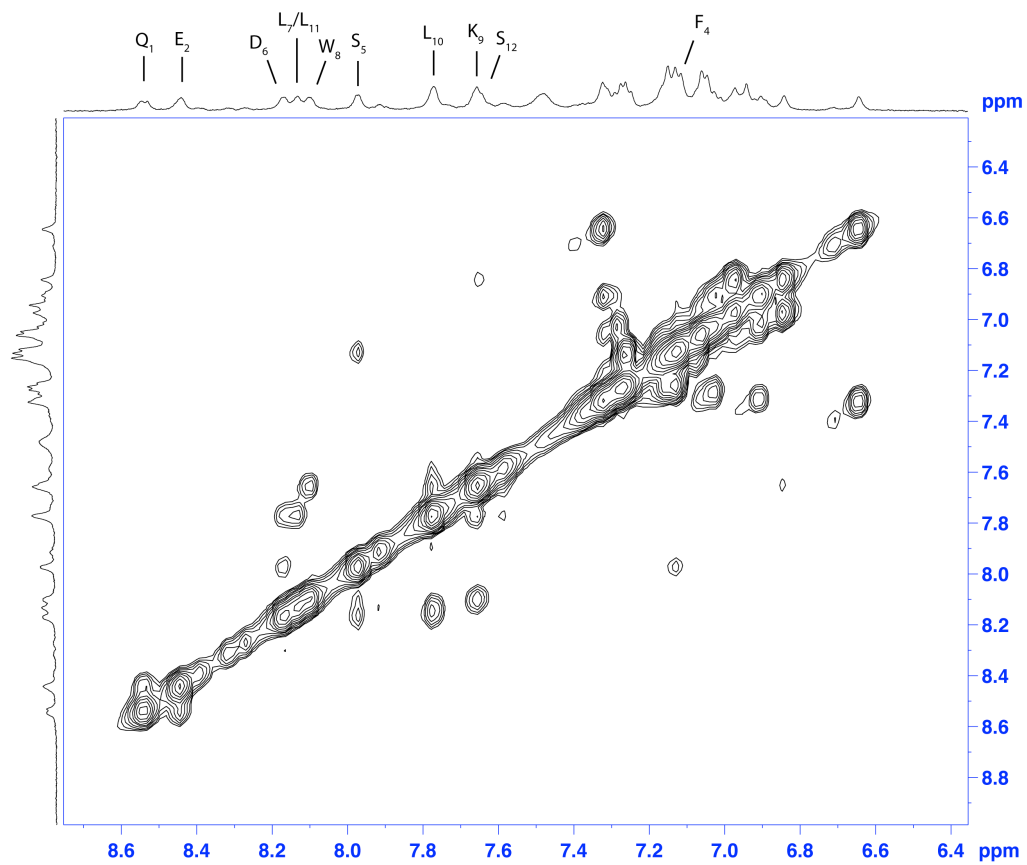

**Figure S5.** NH region of NOESY spectrum for dsHBS 2.

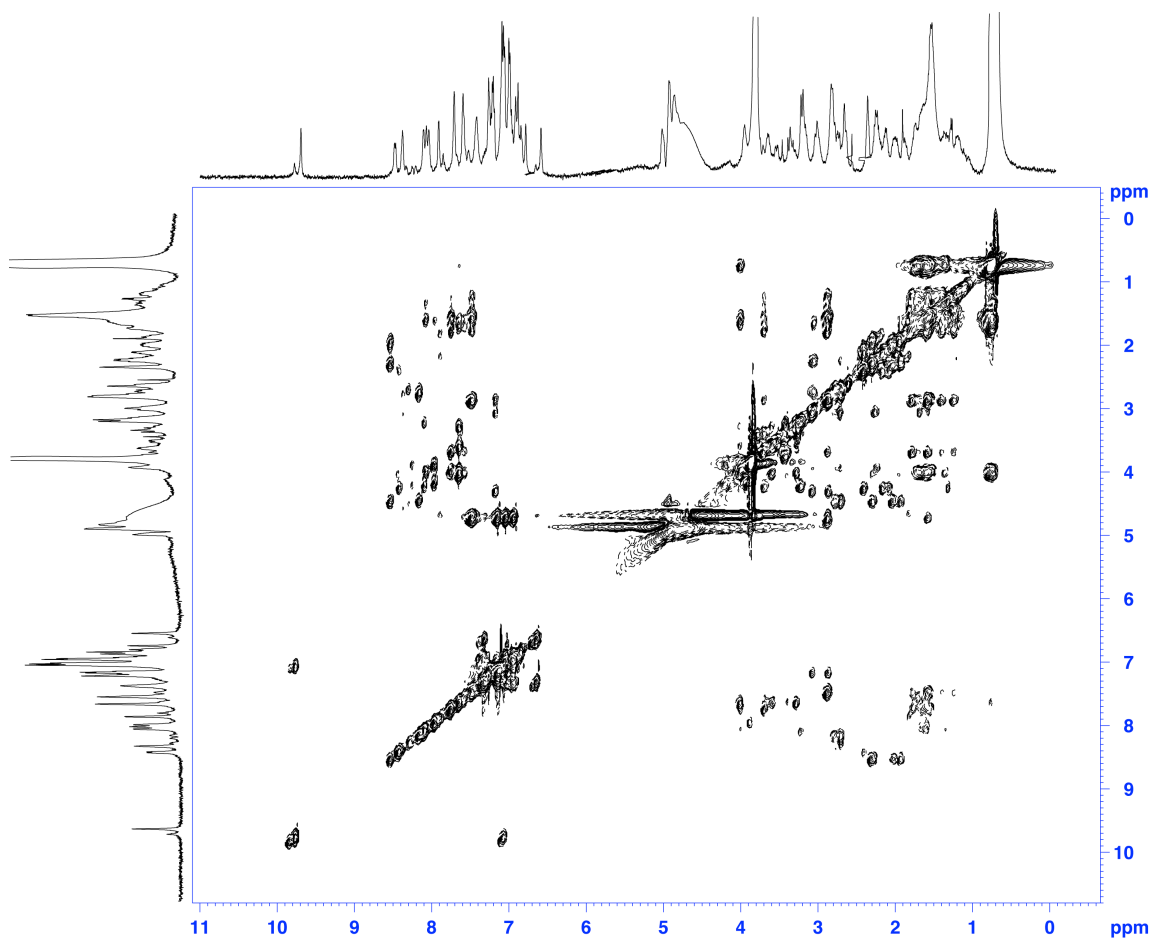

**Figure S6.** TOCSY spectrum for dsHBS 2 in 20% TFE/PBS.
